# Supplementary material for: Serum β-klotho is a potential biomarker for diagnosing alcoholic liver disease and differentiating from nonalcoholic fatty liver disease
Source: PeerJ. 2025 Aug 6;13:e19779. doi: 10.7717/peerj.19779 (PMC12335235; doi:10.7717/peerj.19779)
Supplement: Supplemental Information 1 [file peerj-13-19779-s001.xlsx]

## Sheet: Sheet1
group	KLB	sex	Age	GLU	TG	CHOL	LDL	HDL	CREA	ALB	TBIL	ALT	AST	GGT	ALP	PLT
2	36.1238	2	54	6.06	3.54	4.35	2.24	0.98	65	45.6	7.6	25	19	31	83	258
2	148.489	1	52	7.01	1.6	6.28	4.98	1.19	83	44.1	9.3	17.5	22.4	78	85	291
2	137.736	1	55	5.24	0.99	4.01	2.55	1.16	112	48.4	9.3	20.4	24.5	15	102	155
2	31.0982	2	56	5.83	2.11	4.61	2.66	1.21	74	48.5	15.7	15.3	14.8	22	79	327
2	41.4709	1	57	5.76	1.44	4.69	3.29	1.11	90	47.6	7.2	15.4	18.2	78	88	225
2	36.3307	2	57	5.73	1.99	6.43	4.71	1.33	49	42.8	20.7	23.1	18.8	32	94	247
2	61.4365	2	53	6.63	1.6	5.62	4.04	1.45	68	50	14.1	54	30	44	70	287
2	30.8415	1	54	5.39	2.02	5.84	4.23	1.3	94	48.9	13.4	20	25	119	47	198
2	34.8058	1	57	4.2	0.9	4.37	3.13	1.16	157	46.1	32.1	15.2	22.7	18	88	114
2	363.637	1	55	8.18	2.88	4.9	2.67	1.5	79	43	7.5	30.1	24.4	112	88	289
2	61.4897	1	55	5.28	2.6	5.45	3.49	1.01	98	44.4	8.7	16.7	17	14	56	191
2	42.4612	1	54	7.18	2.53	4.47	2.65	1.39	79	45.7	16.2	42.1	25.7	66	80	209
2	26.1117	1	55	5.7	1.47	5.3	3.35	1.58	98	47.6	9.6	14.9	17.5	40	56	238
2	54.6989	1	56	5.68	2.96	4.05	2.48	0.78	68	49	10.8	44.5	31	32	55	176
2	63.3811	1	55	5.84	3.22	6.19	4.23	1.15	80	47.4	10.1	11.1	18.5	37	65	292
2	85.7428	2	54	5.18	2.9	4.61	2.56	1.19	60	49.3	7.1	19.6	21.4	30	106	208
2	70.3901	1	57	9.12	1.93	6.93	4.99	1.35	62	49.8	19.1	15	18.1	17	70	142
2	34.7026	1	55	6.05	2.92	5.29	3.32	1.13	72	51.1	11.9	14.3	25.2	33	86	197
2	39.8577	1	46	5.58	2.08	5.32	3.64	1.11	79	50.2	12.7	16.8	20.8	19	72	272
2	102.999	1	53	5.81	1.98	6.08	4.35	1.31	84	49.2	7.5	30.8	27.6	36	60	230
2	40.6118	1	55	5.98	1.63	4.94	3.37	1.21	97	45	8.5	16.6	13.6	28	98	254
2	26.29	1	53	5.19	1.96	5.89	4.23	1.15	83	44.6	17.5	42.2	33.1	38	77	139
2	57.5581	1	46	6.46	1.39	5.32	3.42	1.53	71	46.5	14.3	38.2	33.7	71	105	148
2	58.5927	1	52	5.8	2.86	4.95	2.84	1	121	50.8	11.8	33.6	28.7	37	70	129
2	46.1201	1	49	5.59	1.23	3.65	2.45	1.02	90	46	15.4	31.7	18.4	50	49	176
2	32.2289	1	50	5.14	2.55	6.09	4	1.58	71	49.3	11.5	54.6	26.4	346	83	160
2	43.1395	1	56	5.11	1.89	6.51	4.94	1.16	85	48.6	8	21.9	17.8	37	90	265
2	28.5358	1	52	5.87	2.15	4.39	3.13	0.84	79	50.5	12.7	25.9	22.3	32	79	172
2	33.5162	1	53	5.52	1.76	4.44	3.17	0.87	118	47	10.1	39.2	29.2	71	92	247
2	490.782	1	52	7.7	4.01	3.43	1.82	0.62	111	46.2	8.2	27.8	20.7	26	107	153
2	78.0113	1	54	5.25	2.06	4.37	2.94	1.11	81	47.6	11.4	40.2	26.8	82	77	225
2	38.8705	1	48	5.76	2.56	6.71	4.75	1.07	89	43.4	5.3	8.3	23.9	33	84	303
2	70.3096	1	57	5.18	0.73	4.86	3.26	1.35	68	46.1	10.3	19.9	20	17	71	187
2	73.2655	2	57	5.4	1.37	6.33	4.43	1.54	48	46.3	17.2	28	59.2	18	112	195
2	46.2511	1	57	6.22	2.23	4.88	2.94	0.93	79	46.7	14.4	45.5	38.9	155	97	340
2	27.5905	2	52	5.07	1.38	6.94	4.45	2.11	55	49.9	7.5	14.9	17.9	25	119	289
2	134.957	1	55	5.53	0.65	5.31	3.46	1.38	83	46.8	6.4	19.7	23.8	40	52	298
2	60.2927	1	54	5.23	2.33	4.91	3.19	0.92	96	73.3	11.6	22.7	28.3	135	68	300
2	32.5119	1	56	7.47	3.45	3.91	1.41	1.1	90	49.9	8.9	44.3	28.8	115	63	153
2	26.3155	1	53	5.73	1.48	7.88	5.75	1.35	87	46.7	12	20.4	15.9	27	97	195
2	74.4231	1	54	5.16	0.83	5.32	3.57	1.16	83	48.6	8.9	43.1	25.1	58	71	190
2	192.042	2	54	5.06	1.14	4.95	2.87	1.62	66	46.4	7.8	20	30	17	90	175
2	226.693	1	51	5.78	1.52	5.56	3.81	1.28	90	46.8	15.2	27.4	21.8	37	68	219
2	263.853	1	49	6.91	1.34	5.63	3.83	1.32	83	47.9	8.8	19	17.6	27	95	238
2	558.241	1	53	6.03	6.29	5.09	1.78	0.7	95	48.8	20.4	26	22	94	68	177
2	35.6325	1	51	5.43	2.26	4.77	3.08	1.05	81	45.6	16.2	18.4	16.6	20	55	238
2	31.2009	1	49	8.67	3.66	5.59	3.17	1.26	93	49.2	11.7	13	14	24	73	282
2	32.7435	1	52	6.08	1.71	4.97	3.34	0.95	72	47.6	12.4	21.8	17.8	22	95	232
2	43.8706	1	52	5.69	1.43	5.1	3.47	1.17	77	47.1	20.7	18.8	14.2	24	85	251
2	50.0048	1	51	5.68	3.55	5.18	2.87	1.1	62	49.1	10.5	32	21.7	39	51	190
2	204.341	1	47	5.91	1.57	5.57	3.23	1.71	87	48.8	15.7	32.8	30.6	69	53	188
2	26.7232	1	50	7.5	3.31	5.1	2.34	1.09	96	48.8	13.9	20.6	17.3	57	113	146
2	31.7404	1	50	6.32	1.54	2.57	1.36	0.69	92	49.2	5.9	66.3	40.5	62	108	190
2	70.9001	1	52	6.44	1.65	5.12	3.41	1.07	98	45.1	11	26.3	22.1	35	87	167
2	47.5093	1	52	6.14	2.31	5.24	3.52	1.2	60	47.8	14.8	20.8	17.6	78	90	199
2	31.0982	1	53	4.61	1.45	3.79	2.54	0.89	78	46.8	6.8	38.2	21.9	28	70	209
2	61.0639	1	51	5.07	1.17	3.84	2.39	0.85	95	47.9	5.9	10.5	13.9	18	41	375
2	30.1745	2	51	9.05	1.95	4.27	2.41	1.13	63	45.4	5.2	34.4	22.9	38	92	259
2	30.4566	1	48	5.88	0.76	4.83	3.48	1.33	90	45.4	32	14.2	16.1	24	66	242
2	397.34	2	48	5.24	0.81	2.38	3.47	1.5	96	47.3	8.5	19.5	17.9	77	78	117
2	32.795	1	48	5.18	3.51	4.54	2.76	0.91	83	48.5	18.3	28	22.7	73	107	218
2	104.711	1	50	4.76	2.59	4.18	2.38	1.2	92	46.4	9	18.6	18.3	45	77	311
2	107.949	1	52	5.65	2.82	4.05	2.37	0.98	75	46	8.9	20.8	11.8	30	83	133
2	273.665	1	47	5.36	2.05	5.48	3.71	1.12	94	44.8	13.6	22	20	42	59	163
2	61.2768	1	47	5.19	3.56	5.15	3.23	1.01	73	45.8	12.5	36.3	27	72	99	191
2	63.0612	1	52	7.01	1.6	6.28	4.98	1.19	83	44.1	9.3	17.5	22.4	78	85	291
2	20.1374	1	52	5.25	1.12	4.33	2.79	1.3	79	44.9	9.8	28.5	18.5	42	87	186
2	48.1391	1	53	4.99	2.65	4.72	3.28	0.87	88	42.6	5.1	25.1	20.5	29	79	175
1	179.142	1	55	5.25	2.27	5.38	2.97	1.87	84	45.3	9.5	25	22.5	119	73	198
1	120.846	2	50	5.07	0.87	4.01	2.68	1.21	62	43.2	7.9	8.4	12.7	7	68	277
1	65.6233	1	50	5.13	1.39	6.44	4.92	1.29	103	45.2	19.3	18	18.3	39	67	233
1	44.3932	2	55	4.73	1.1	4.1	2.19	1.71	67	44.3	20.6	14.4	18.7	12	84	188
1	113.336	2	56	5.12	0.65	4.38	2.45	1.89	54	47.4	13.5	13.1	14	12	87	68
1	45.2039	2	56	11.56	0.6	5.21	3.16	2.09	49	48.5	7.8	13.3	15.3	15	67	236
1	68.138	1	52	5.02	1.74	5.6	3.12	1.79	77	45.4	6.8	16.2	27	38	70	193
1	61.9955	1	52	7.43	1.68	5.63	3.88	1.45	90	45.2	14.7	14.1	15.8	9	58	216
1	72.351	1	55	5.57	0.93	4.35	2.97	1.11	58	48.4	10.7	13	22.3	25	87	249
1	57.5316	1	56	4.89	1.53	5.16	3.57	1.23	78	48	12.9	14.5	14	31	76	297
1	432.853	2	56	5.48	1.16	5.08	3.69	1.3	56	47.6	7.1	16.4	16.3	22	71	253
1	35.5033	1	58	5.17	1.61	4.1	2.74	0.95	88	46.6	9.6	13.1	20.9	25	46	173
1	58.3008	1	52	5.75	1.26	5.36	3.44	1.64	84	48.7	10.4	20.3	16.4	67	61	276
1	398.122	1	52	5.41	0.88	5.3	3.26	1.76	79	46.2	16.4	10.5	14.9	17	74	188
1	93.8993	1	51	4.85	1.66	5.44	3.76	1.02	115	44.8	15.2	18.3	18.8	12	66	123
1	74.1538	1	54	5.35	2.13	4.01	2.43	1.13	104	48	24.6	28.3	30.8	32	85	153
1	43.949	1	51	5.9	1.48	3.54	1.87	1.21	101	52.3	14.3	23.5	18.7	36	77	275
1	26.9781	1	54	5.9	1.09	4.6	2.9	1.39	92	49.2	26.3	15.8	19.6	24	77	178
1	92.2845	1	51	5.39	1.68	6.98	4.39	2.12	69	47.6	17.2	14.1	17.9	38	73	193
1	93.735	1	52	5.19	0.82	5.13	3.28	1.5	74	50.1	7.3	11	20.1	28	39	213
1	113.754	2	55	4.88	1.1	6.67	4.27	2.01	57	47.1	8.4	5.3	19.2	10	95	182
1	25.1196	1	51	5.3	1.08	4.85	2.91	1.57	68	47	16.6	27.9	23	26	65	197
1	54.0382	1	52	5.36	0.66	6.29	4.17	1.75	74	46.1	9.5	18.9	19.8	17	84	301
1	73.7769	1	55	5.08	1.04	4.28	2.3	1.57	93	46.3	10.7	14.3	16.9	21	158	291
1	81.9631	1	53	5.89	1.47	5.83	4.01	1.13	93	47.3	11	12.2	15.7	27	49	210
1	275.148	1	52	4.9	1.21	5.5	3.51	1.53	82	46.8	14.1	12.3	16.3	13	86	216
1	38.2218	1	50	13.36	0.72	5.02	3.48	1.17	86	47.1	7.9	15	11.6	30	116	175
1	140.921	1	49	5.35	0.75	4.87	3.15	1.32	92	46.4	19.9	12.7	20.9	20	56	110
1	73.8307	1	47	5.3	1.74	5.89	4.26	1.31	73	44.2	17.7	42.6	20.8	68	116	234
1	43.7139	1	48	4.85	0.72	3.66	2.05	1.37	88	48.3	17.8	21.6	18.3	26	88	259
1	38.2218	2	52	5.87	1.17	3.24	2.3	0.78	83	50.5	11	17.7	20.2	12	68	185
1	61.33	2	53	6.13	1.48	5.75	4.1	1.2	62	46.9	9.2	24.7	22.9	31	102	196
1	66.5589	2	48	5.47	0.83	5.1	3.53	1.48	67	45.6	12.2	14.6	17.3	13	53	341
1	321.86	1	50	5.18	0.95	4.46	2.22	1.87	83	49.2	19.4	15.9	18.8	28	71	160
1	55.6775	1	52	5.51	1.34	4.32	2.79	1.33	79	50	13.9	16.4	20.7	16	84	254
1	66.4519	2	48	5.58	2.35	5.03	3.48	1.01	70	46.8	7.8	11.8	15.7	15	67	277
1	47.0897	1	55	5.86	1.3	4.44	3.11	1.13	84	48.6	19.4	28.6	22.1	34	90	163
1	57.24	1	49	4.99	0.68	3.76	2.38	1.32	80	47.5	8.8	12.2	15.7	18	74	281
1	133.654	1	49	5.73	1.53	7.31	5.56	1.49	83	47	32.2	6	14	17	65	235
1	41.9138	1	47	5.48	1.15	4.51	2.69	1.73	72	50.2	10.8	15.8	18.3	94	60	323
1	217.726	1	54	5.37	1	5.32	3.81	1.45	60	47.6	18.2	25.6	22	41	68	161
1	86.8266	1	48	5.51	2.23	4.85	3.08	0.93	96	49.8	8.8	32.8	20.8	35	91	286
1	460.383	2	46	4.83	0.92	5.23	3.75	1.31	70	47.2	6.4	17.5	17.5	15	64	3.12
1	375.356	2	47	5.07	1.47	5.46	3.47	1.79	71	52.2	16.2	24.4	24.8	12	88	176
1	19.9362	1	49	5.8	0.9	6.17	3.94	1.94	104	48.6	13.3	28.4	25.8	22	85	176
1	98.0147	2	54	5.74	2.15	5.69	3.57	1.45	87	48	10.2	16.9	21.6	16	109	280
1	75.0967	2	50	4.97	0.79	4.02	2.39	1.53	59	46.1	7.7	19.3	19.3	19	63	327
1	174.592	1	54	4.94	1.05	3.75	2.06	1.26	103	52.7	8.4	65.7	28.7	71	85	112
1	76.661	1	55	6.04	0.97	4.26	1.69	1.76	67	46.7	12	39.6	28.7	116	97	197
1	22.989	1	50	5.96	1.39	4.41	2.91	1.07	75	44.1	17.7	13	13.8	19	70	223
1	230.295	1	47	6.57	2.96	6.29	3.68	1.5	85	51.4	15.3	26.9	24.9	48	55	160
1	52.5863	2	54	5.36	1.46	5.57	3.53	1.58	64	47.1	5.3	6	10.4	17	91	226
1	46.5393	1	49	5.56	0.4	4.55	3	1.47	97	45.1	15.9	22.2	25.3	34	77	187
1	51.1367	1	47	4.99	0.74	4.96	2.79	2	84	49.3	19.8	37.1	25.8	15	61	228
1	183.268	2	53	5.5	3.03	5.56	3.18	1.24	69	50.2	9.4	16.8	24.2	42	97	199
1	48.7168	1	48	5.18	1.68	5.89	4.75	1.64	79	49.8	27.1	28.1	22.9	26	83	169
1	286.845	2	53	5.52	1.2	4.62	2.93	1.08	76	44.1	9.5	16.9	9.7	11	72	148
1	1965.65	2	47	5.08	0.57	4.89	2.64	2.06	56	48.2	9.7	7.6	14.5	19	40	181
1	627.44	2	50	4.65	1.65	5.5	3.41	1.4	64	47.4	8.7	14.6	11.2	26	44	248
1	195.345	1	46	4.9	1.28	4.39	2.67	1.2	90	46.3	12.6	12.6	14.4	12	96	188
1	899.827	1	61	5.05	1.77	6.12	3.97	1.5	87	48.2	17.2	17.7	17.5	38	54	220
1	331.631	1	56	4.83	0.87	5.35	3.3	1.7	101	47.7	8.6	14.9	16	21	63	215
1	159.797	1	52	5.2	0.55	4.26	2.47	1.55	79	43.9	10.8	5	14.8	14	49	195
1	578.592	1	58	4.66	1.17	4.09	2.34	1.16	94	46.3	13.8	11.8	13.2	23	67	166
1	426.473	1	59	7.51	1.14	5.14	3.28	1.5	75	48.5	18.5	30.3	31.4	45	71	165
1	129.875	1	49	4.66	1.43	5.56	3.58	1.29	57	49.8	14.8	13.2	20	15	50	176
3	244.548	1	38	7.41	3.84	5.15	3.46	1.38	81	46.9	43.1	607	422	990	176	214
3	824.33	1	41	9.02	3.36	3.34	0.3	0.26	56	43.1	403.6	412.5	216.1	176	166	303
3	178.787	1	66	4.5	0.82	4.29	2.68	1.51	65	42.7	28.1	145.1	112.2	750	505	277
3	322.275	1	60	5.41	2	3.38	2.38	0.92	74	45.4	12.7	39.1	33.3	89	78	90
3	207.36	1	67	4.83	1.07	5.61	4.44	1.47	74	42.5	10.2	7.2	15.8	17	77	248
3	1858.86	1	51	10.12	1.96	3.59	2.88	0.78	69	42.6	4.4	23.5	17.3	31	79	207
3	2748.27	2	56	8.65	1.62	4.77	3.31	1.14	56	47.7	16.8	518.9	286	285	106	89
3	2643.8	1	62	6.13	1	3.75	2.2	1.3	94	44.5	14.3	12	16	27	112	128
3	2738.85	2	58	7.23	1.01	5.95	3.85	2.45	52	43.7	115.2	25	97	295	88	47
3	2816.65	1	63	8.75	2.9	5.27	3.32	1.46	74	37.8	7.5	459.3	189.3	228	89	201
3	2279.48	1	54	4.98	0.61	4.23	2.94	1.11	96	43.1	8.1	40.6	30.9	121	69	303
3	2429.59	1	54	5.3	1.68	3.93	2.39	1.05	105	45.1	19.8	161.7	61.6	37	93	132
3	2802.51	1	46	8.33	1.04	5.62	3.91	1.62	51	45.8	22.5	157	131.3	1134	185	193
3	1363.83	1	61	3.33	0.48	4.82	3.28	1.64	60	34.6	18.9	97.4	137.8	852	189	106
3	400.757	1	69	5.03	1.39	3.25	1.97	0.75	68	37.4	14	13.7	30.7	81	101	166
3	925.227	1	71	4.73	0.85	4.47	3.2	1.39	132	30.7	15.1	19.5	33.5	85	104	38
3	1562.56	1	78	6.16	1.68	4.85	3.68	1.14	82	35.6	52.3	106.3	134.3	357	301	104
3	1777.14	1	57	4.5	1.12	3.38	1.39	1.75	80	25.8	92.5	30.2	67.6	58	90	44
3	2773.28	1	66	8.45	0.65	3.34	1.71	1.67	57	39.9	34.7	18.6	42.6	27	280	44
3	2566.79	1	69	7.16	0.86	2.3	1.34	0.75	73	35.4	9	14	19	65	94	155
3	2764.64	1	64	5.77	0.9	2.22	0.96	0.87	461	37	10.1	15.9	22.3	179	137	18
3	2565.98	1	50	7.1	1.4	4.42	3.37	1.02	48	42.3	7.6	32	24.2	194	124	212
3	2411.8	1	62	8.58	1.49	2.11	0.96	0.63	56	30.9	25.7	12.1	45.8	368	143	117
3	2256.94	1	70	5.98	0.95	3.46	1.95	1.45	58	43.4	37.5	45.5	74.1	285	107	107
3	2567.25	1	52	7.42	1.57	6.93	2.97	1.07	118	43.2	25	15.9	32.9	329	274	38
3	2743.68	1	50	6.38	5.61	9.8	4.95	0.3	78	27.9	26.6	81	123.3	598	89	24
3	2768.05	1	53	4.54	2.2	5.23	3	0.59	60	33.3	42.9	92	156.5	703	260	118
3	2828.63	1	55	4.58	2.86	6.93	4.44	0.87	60	29.6	105.1	27	64	77	311	44
3	2813.82	1	45	7.15	2.75	3.23	0.94	0.38	37	29.1	43.6	12	144	1489	523	199
3	2809.14	1	63	6.28	0.73	2.38	1.16	0.81	63	32.9	124.6	56	56	45	66	59
3	2800.3	1	36	3.35	3.09	3.07	0.55	0.15	187	29.1	437.8	23.2	115.8	775	105	93
3	2494.09	1	63	2.45	1.63	5.5	2.39	1.09	279	34	157.1	2522.2	9256	180	509	38
3	2795.64	1	57	6.93	0.72	1.98	0.89	0.8	159	29.7	21.2	8	17.2	18	67	81
3	2783.16	1	69	4.34	0.58	4.1	2.35	1.75	74	22.4	79.4	23	47.7	23	90	82
3	2774.25	1	48	6.34	2.04	5.2	3.39	1.29	77	28	163.4	36.2	150.3	133	123	60
3	1895.48	1	63	5.8	0.65	4.59	2.61	1.77	65	42.1	4.9	15.4	16.9	27	79	286
3	94.578	1	63	6.16	0.74	3.19	1.98	0.99	57	42.6	24.1	15.6	21.9	32	121	145
3	62.0557	2	58	9.82	1.68	6.77	4.39	2.02	48	38.2	19.1	27.7	66.2	1140	216	243
3	77.2838	1	56	9.88	1.57	3.9	1.5	1.55	73	32.8	6.9	26.6	27.8	57	89	90
3	839.686	1	71	9.32	1.54	2.86	1.6	0.46	85	41.4	12.1	25.9	41.5	384	78	120
3	413.574	1	69	4.76	1.42	5.55	3.6	1.32	97	28.1	257	42.5	54	331	653	127
3	383.637	1	72	7.64	2.49	6.36	4.12	0.71	66	27.2	24.1	67.7	167.4	1540	222	129
3	493.628	1	73	5.78	1.2	3.61	1.99	1.36	84	40.4	14.5	22.6	32.2	152	82	172
3	310.953	1	58	4.41	0.55	2.57	1.76	0.9	124	38	16.1	8.8	14.4	42	42	413
3	3021.74	1	55	8.16	1.56	3.39	1.78	0.77	53	31	57	252.4	329	494	148	84
3	2670.29	1	54	4.49	0.81	3.88	2.18	1.53	82	34.4	53.9	39.7	61.3	65	105	65
3	598.191	1	68	5.23	0.41	1.97	1.18	0.67	68	29.4	32.7	55.8	94.3	269	83	30
3	1180	1	40	7.1	0.92	6.12	4.96	1.46	83	39.7	9.2	19.3	24.6	12	67	167
3	421.095	1	69	16.32	3.14	5.64	2.94	1.69	212	34.1	4.1	15.2	14.1	60	65	271
3	1062.1	1	48	4.8	1.55	4.04	2.48	0.67	69	34.4	58.7	25.1	105	621	236	94
3	384.933	1	44	10.59	1.43	5.15	3.5	1.08	57	30.9	39.2	42.4	67.8	41	154	19
3	141.449	2	68	8.1	0.9	3.91	2.79	1.77	78	35.6	56.4	31.7	91.6	100	78	62
3	1966.01	2	54	5.79	1.82	3.24	1.57	0.82	49	34.8	41.3	19.6	33.8	202	74	215
3	185.454	1	56	6.56	1.31	3.47	2.17	0.86	103	38.4	6.7	36.5	25.2	128	145	58
3	1300.41	1	53	6.56	1.48	5.56	2.74	1.37	78	30.6	20.4	19.1	52	174	276	330
3	459.219	1	50	5.14	0.66	3.16	2.28	0.9	76	30	16.6	18.5	34.7	76	136	20
3	175.986	1	68	4.98	0.75	2.9	1.68	1.14	110	38.8	22	25.3	33.5	67	86	23
3	173.978	1	71	4.35	0.73	4.5	2.39	2.51	85	35.4	30	60.1	55.1	805	673	174
3	1045.56	1	71	4.57	0.8	2.76	1.76	0.86	60	35.1	60.9	27.8	48.7	420	209	205
3	2557.99	1	34	6.22	1.72	4.21	3.11	0.91	79	40.3	26.4	1554.6	172.4	212	72	197
3	1375.88	1	51	4.4	1.38	4.63	2.76	1.54	209	37.1	265.9	21.1	63.9	16	114	82
3	985.578	1	70	4.09	2.46	3.01	0.75	0.22	71	24	381.4	349.6	613.2	126	259	112
3	1146.5	1	48	9.1	2.64	3.89	0.69	0.23	75	34.3	244.7	289.6	115.2	251	252	86
3	906.591	2	70	8.52	0.79	3.46	1.94	1.24	37	26.9	22.4	118.3	217.9	24	112	67
3	1149.65	1	34	4.17	1.34	5.5	2.79	1.62	50	28.8	341.1	18.3	87.2	359	129	44
3	682.632	1	48	8.12	0.79	4.46	2.8	1.4	66	24.5	50.2	52.5	56.1	35	104	151
3	217.313	1	58	4.63	1.58	3.29	1.41	1.35	91	43.6	11.9	18.8	22.9	33	94	135
3	3908.07	1	52	4.47	1.07	1.9	0.69	0.26	100	31.9	366.3	111.1	59.2	91	86	62
3	917.021	1	63	6.95	0.67	1.78	0.69	0.73	79	25.7	23.9	44.3	136.6	254	77	70
3	329.832	1	71	4.89	1.29	5.99	3.81	1.77	74	34.5	7.3	22.2	30.9	79	117	49
