# Supplementary material for: Serum β-klotho is a potential biomarker for diagnosing alcoholic liver disease and differentiating from nonalcoholic fatty liver disease
Source: PeerJ. 2025 Aug 6;13:e19779. doi: 10.7717/peerj.19779 (PMC12335235; doi:10.7717/peerj.19779)
Supplement: Supplemental Information 3 [file peerj-13-19779-s003.xlsx]

## Sheet: HC
	Temperature(¡C)	1	2	3
	29.1	2.7297	0.9857	1.355	0.272	0.3641	0.1945	0.1991	0.2398	0.14	0.2079
	450nm	2.1969	2.7052	0.4729	0.2535	0.2868	0.2268	0.2178	0.4817	0.3661	0.2242
		1.5589	1.7505	0.6458	0.29	0.2053	0.2931	0.2521	0.1976	0.2929	0.6544
		0.8286	0.6957	0.445	0.241	0.1566	0.3144	0.2646	0.1939	0.6243	0.2135
		0.4689	2.122	0.2655	1.3666	0.3456	0.9454	1.0769	0.7635	0.2955
		0.2624	1.1113	0.2002	0.1795	0.3514	0.1842	0.2322	0.3323	0.1469
		0.156	0.5746	0.4162	0.2424	0.4186	0.51	0.2636	1.4268	0.8011
		0.1121	1.6655	0.2043	1.2804	0.1508	0.2896	0.2076	1.2226	0.2222
	Temperature(¡C)	1	2	3
	29.1	0.0631	0.06	0.057	0.0535	0.0642	0.0501	0.0515	0.0539	0.0508	0.0526
	570nm	0.0572	0.0538	0.0538	0.0536	0.0498	0.0503	0.0849	0.0499	0.0528	0.056
		0.0637	0.0515	0.0614	0.0586	0.0571	0.0572	0.0542	0.0548	0.0529	0.0563
		0.0521	0.0576	0.0561	0.0543	0.0517	0.0528	0.0509	0.0512	0.0551	0.0521
		0.0495	0.0605	0.0547	0.0536	0.0509	0.0547	0.0499	0.0524	0.0507
		0.0482	0.057	0.0508	0.0536	0.052	0.0513	0.0509	0.0552	0.0511
		0.0529	0.0549	0.0524	0.0534	0.0534	0.0538	0.0503	0.0508	0.0496
		0.0526	0.0513	0.0527	0.0512	0.0502	0.0536	0.0507	0.0512	0.0498
450nm-570nm	标准品浓度	标曲
	2000	2.6666	0.9257	1.298	0.2185	0.2999	0.1444	0.1476	0.1859	0.0892	0.1553
	1000	2.1397	2.6514	0.4191	0.1999	0.237	0.1765	0.1329	0.4318	0.3133	0.1682
	500	1.4952	1.699	0.5844	0.2314	0.1482	0.2359	0.1979	0.1428	0.24	0.5981
	250	0.7765	0.6381	0.3889	0.1867	0.1049	0.2616	0.2137	0.1427	0.5692	0.1614
	125	0.4194	2.0615	0.2108	1.313	0.2947	0.8907	1.027	0.7111	0.2448
	62.5	0.2142	1.0543	0.1494	0.1259	0.2994	0.1329	0.1813	0.2771	0.0958
	31.3	0.1031	0.5197	0.3638	0.189	0.3652	0.4562	0.2133	1.376	0.7515
	0	0.0595	1.6142	0.1516	1.2292	0.1006	0.236	0.1569	1.1714	0.1724

## Sheet: NAFLD
	标曲
Temperature(¡C)	1	3	4	5	6	7	8	9	10	11
26.7	3.03505	0.8029	0.1814	0.2806	0.2921	0.2291	0.4927	0.1974	0.2934	0.1877
450	2.4877	0.182	1.3841	0.3009	0.2225	0.2117	0.1787	0.3268	0.1743	0.2965
	1.61255	0.2509	1.2927	0.2134	0.1638	0.1789	0.2076	0.2825	1.9466	0.167
	0.970075	0.1814	0.5716	0.3283	1.7731	0.1591	0.2255	0.2915	0.3015	0.1341
	0.632175	0.1911	0.1583	0.9915	0.159	0.1869	0.7592	1.0223	0.329	0.2419
	0.439825	0.3385	0.1818	0.1575	1.619	0.3428	0.2671	0.6087	0.3543	0.2918
	0.349125	0.2397	0.5628	0.1963	0.1759	0.8743	0.465	0.1821	0.194	0.34
	0.242	0.1754	0.2355	0.2156	0.2384	0.4527	0.4471	0.2989	0.1919	1.3281
Temperature(¡C)	1	3	4	5	6	7	8	9	10	11
26.7	0.0525	0.0547	0.052	0.0524	0.0536	0.0529	0.0514	0.051	0.0506	0.0514
570	0.0628	0.0551	0.0549	0.0508	0.0517	0.0509	0.0514	0.0505	0.051	0.0535
	0.055	0.0513	0.056	0.0497	0.0506	0.052	0.0506	0.0504	0.0557	0.0501
	0.05395	0.049	0.0514	0.0501	0.0547	0.0493	0.0521	0.0501	0.0526	0.0503
	0.05205	0.0498	0.0501	0.0511	0.0509	0.0534	0.0521	0.0513	0.053	0.0494
	0.05095	0.0515	0.0505	0.0501	0.0534	0.0515	0.0497	0.0508	0.0497	0.0494
	0.05025	0.0496	0.0524	0.0491	0.05	0.0526	0.051	0.0488	0.0495	0.0511
	0.0525	0.051	0.0502	0.0486	0.0536	0.0504	0.051	0.0567	0.051	0.0588
标准品浓度	450-570（OD）
2000	2.98255	0.7482	0.1294	0.2282	0.2385	0.1762	0.4413	0.1464	0.2428	0.1363
1000	2.4249	0.1269	1.3292	0.2501	0.1708	0.1608	0.1273	0.2763	0.1233	0.243
500	1.55755	0.1996	1.2367	0.1637	0.1132	0.1269	0.157	0.2321	1.8909	0.1169
250	0.916125	0.1324	0.5202	0.2782	1.7184	0.1098	0.1734	0.2414	0.2489	0.0838
125	0.580125	0.1413	0.1082	0.9404	0.1081	0.1335	0.7071	0.971	0.276	0.1925
62.5	0.388875	0.287	0.1313	0.1074	1.5656	0.2913	0.2174	0.5579	0.3046
31.3	0.298875	0.1901	0.5104	0.1472	0.1259	0.8217	0.414	0.1333	0.1445
0	0.1895	0.1244	0.1853	0.167	0.1848	0.4023	0.3961	0.2422	0.1409

## Sheet: ALD
Temperature(¡C)	1	2	3	4	5	6	7	8	9	10
26	2.9911	0.7127	2.7988	1.0948	3.7485	1.0681	3.7137	3.7178	3.5036	3.5372
450	1.7979	1.6053	2.9234	0.8416	0.9371	0.5784	2.3331	4.5871	3.6118	3.2803
	1.6831	0.6006	0.44	3.9091	3.7483	3.7474	1.8679	1.7235	3.7446	3.7642
	0.628	0.837	0.4057	3.675	3.3965	0.5704	2.0073	0.8163	3.7219	3.4349
	0.4621	0.6663	0.4244	1.2688	0.5427	3.255	1.7208	2.5192	3.7852	3.7693
	0.3325	2.3263	1.6348	2.0898	3.0027	1.8599	2.0635	2.8427	3.5406	3.7615
	0.2888	0.9628	0.9667	0.9749	0.6086	3.5401	1.4008	3.708	3.7217
	0.363	1.7546	0.9326	1.9366	2.2166	3.5185	0.6367	3.7833	3.78
Temperature(¡C)	1	2	3	4	5	6	7	8	9	10
26	0.0753	0.1253	0.1174	0.1089	0.1056	0.1363	0.1135	0.0975	0.1172	0.0877
570	0.0657	0.1221	0.1154	0.1466	0.1232	0.1023	0.1156	0.1568	0.0954	0.09
	0.0577	0.12	0.0947	0.0872	0.1156	0.122	0.1578	0.1086	0.12	0.1103
	0.0468	0.1238	0.1114	0.1361	0.0839	0.0976	0.0809	0.0909	0.1257	0.1062
	0.0441	0.1393	0.1064	0.1212	0.1224	0.086	0.1205	0.0791	0.1275	0.1226
	0.043	0.1236	0.1295	0.1197	0.1212	0.0679	0.133	0.0734	0.0904	0.113
	0.0464	0.1237	0.1072	0.1034	0.1172	0.0895	0.1256	0.104	0.1042
	0.045	0.1282	0.1208	0.1223	0.0927	0.076	0.0935	0.1136	0.12
450-570	标曲
	2.9158	0.5874	2.6814	0.9859	3.6429	0.9318	3.6002	3.6203	3.3864	3.4495
	1.7322	1.4832	2.808	0.695	0.8139	0.4761	2.2175	4.4303	3.5164	3.1903
	1.6254	0.4806	0.3453	3.8219	3.6327	3.6254	1.7101	1.6149	3.6246	3.6539
	0.5812	0.7132	0.2943	3.5389	3.3126	0.4728	1.9264	0.7254	3.5962	3.3287
	0.418	0.527	0.318	1.1476	0.4203	3.169	1.6003	2.4401	3.6577	3.6467
	0.2895	2.2027	1.5053	1.9701	2.8815	1.792	1.9305	2.7693	3.4502	3.6485
	0.2424	0.8391	0.8595	0.8715	0.4914	3.4506	1.2752	3.604	3.6175
	0.318	1.6264	0.8118	1.8143	2.1239	3.4425	0.5432	3.6697	3.66
